# Supplementary material
Source: publisher site journal article supplement (https://www.dovepress.com/article/337617)
Supplement: Supplementary file 1 [file get_supplementary_file.php]

|  | **N** | **Mean ± SD** | **M (Q1,Q3)** |
| --- | --- | --- | --- |
| **CERAD** | 2421 | 6.01±2.29 | 6 (5,8) |
| **AF** | 2421 | 16.86±5.51 | 16 (13,20) |
| **DSST** | 2421 | 46.83±16.99 | 47 (35,59) |

**Supplementary material**

**Supplementary Table 1. Means, SDs, and ranges for the cognitive tests**

CERAD: Consortium to Establish a Registry for Alzheimer’s Disease

AF: Animal Fluency

DSST: Digit Symbol Substitution Test

SD: Standard deviation
